# Supplementary material
Source: PubMed Central journal article supplement (PMC9685548)
Supplement: jamadermatol-e224820-s001.pdf [file jamadermatol-e224820-s001.pdf]

## Supplemental Online Content

Gómez-Tomás A, Bouwes Bavinck JN, Genders R, et al. External validation of the Skin and UV Neoplasia Transplant Risk Assessment Calculator (SUNTRAC) in a large European solid organ transplant recipient cohort. *JAMA Dermatol*. Published online November 23, 2022. doi:10.1001/jamadermatol.2022.4820

**eTable 1.** Clinical and Demographic Characteristics of the Validation Cohort by Skin and Ultraviolet Neoplasia Risk Assessment Calculator (SUNTRAC) Risk Group

**eTable 2.** Subdistribution Hazard Ratios (SHR) and Their 95% CIs From a Univariate Competing Risk Regression Analysis Including SUNTRAC Group as Predictor in Validation Cohort and in the TSCN Study

**eFigure 1.** Density Plots Displaying SUNTRAC Score Distribution in Validation Cohort

**eFigure 2.** Cumulative Incidence of Skin Cancer After Transplant by SUNTRAC Risk Group and Country

**eFigure 3.** Time-Dependent Area Under the Receiving Operating Characteristic Curve (t-AUROC) After Transplant and ROC Curves at 5 Years After Transplant by Country

This supplemental material has been provided by the authors to give readers additional information about their work.

**eTable 1.** Clinical and Demographic Characteristics of the Validation Cohort by Skin and Ultraviolet Neoplasia Risk Assessment Calculator (SUNTRAC) Risk Group

|                                                | Low-Risk (N=580)  | Medium-Risk (N=1573) | High-Risk (N=1153) | Very-High-Risk (N=115) | P-value              |
|------------------------------------------------|-------------------|----------------------|--------------------|------------------------|----------------------|
| <b>Sex</b>                                     |                   |                      |                    |                        | < 0.001 <sup>1</sup> |
| Female                                         | 247 (42.6%)       | 893 (56.8%)          | 109 (9.5%)         | 40 (34.8%)             |                      |
| Male                                           | 333 (57.4%)       | 680 (43.2%)          | 1044 (90.5%)       | 75 (65.2%)             |                      |
| <b>Age at transplant (years)</b>               |                   |                      |                    |                        | < 0.001 <sup>2</sup> |
| Median (Q1-Q3)                                 | 49.0 (40.0, 59.0) | 44.0 (35.0, 53.0)    | 60.0 (55.0, 65.0)  | 66.0 (61.0, 70.0)      |                      |
| <b>Age at transplant (over 50y)</b>            |                   |                      |                    |                        | < 0.001 <sup>1</sup> |
| No                                             | 303 (52.2%)       | 1102 (70.1%)         | 8 (0.7%)           | 0 (0.0%)               |                      |
| Yes                                            | 277 (47.8%)       | 471 (29.9%)          | 1145 (99.3%)       | 115 (100.0%)           |                      |
| <b>Race</b>                                    |                   |                      |                    |                        | < 0.001 <sup>1</sup> |
| Asian                                          | 71 (12.2%)        | 1 (0.1%)             | 0 (0.0%)           | 0 (0.0%)               |                      |
| Black                                          | 135 (23.3%)       | 2 (0.1%)             | 0 (0.0%)           | 0 (0.0%)               |                      |
| Latinx                                         | 268 (46.2%)       | 7 (0.4%)             | 0 (0.0%)           | 0 (0.0%)               |                      |
| Middle Eastern and North African               | 106 (18.3%)       | 3 (0.2%)             | 0 (0.0%)           | 0 (0.0%)               |                      |
| White                                          | 0 (0.0%)          | 1560 (99.2%)         | 1153 (100.0%)      | 115 (100.0%)           |                      |
| <b>Type of transplant (abdominal/thoracic)</b> |                   |                      |                    |                        | < 0.001 <sup>1</sup> |
| Abdominal                                      | 552 (95.2%)       | 1453 (92.4%)         | 862 (74.8%)        | 104 (90.4%)            |                      |
| Thoracic                                       | 28 (4.8%)         | 120 (7.6%)           | 291 (25.2%)        | 11 (9.6%)              |                      |
| <b>Pretransplant history of skin cancer</b>    |                   |                      |                    |                        | < 0.001 <sup>1</sup> |
| No                                             | 580 (100.0%)      | 1571 (99.9%)         | 1145 (99.3%)       | 0 (0.0%)               |                      |
| Yes                                            | 0 (0.0%)          | 2 (0.1%)             | 8 (0.7%)           | 115 (100.0%)           |                      |
| <b>SUNTRAC score (points)</b>                  |                   |                      |                    |                        | < 0.001 <sup>2</sup> |
| Median (Q1-Q3)                                 | 2.0 (2.0, 6.0)    | 11.0 (9.0, 13.0)     | 15.0 (15.0, 15.0)  | 21.0 (19.0, 21.0)      |                      |
| <b>Follow-up time (years)</b>                  |                   |                      |                    |                        | < 0.001 <sup>2</sup> |
| Median (Q1-Q3)                                 | 6.3 (3.0, 10.3)   | 7.0 (3.5, 11.2)      | 4.3 (2.3, 7.3)     | 2.0 (1.1, 4.3)         |                      |
| <b>Skin cancer after transplant</b>            |                   |                      |                    |                        | < 0.001 <sup>1</sup> |
| No                                             | 568 (97.9%)       | 1347 (85.7%)         | 854 (74.1%)        | 49 (42.6%)             |                      |
| Yes                                            | 12 (2.1%)         | 226 (14.3%)          | 299 (25.9%)        | 66 (57.4%)             |                      |
| <b>Type of skin cancer (first event)</b>       |                   |                      |                    |                        | 0.154 <sup>1</sup>   |
| Basal cell carcinoma                           | 5 (41.7%)         | 132 (58.4%)          | 140 (46.8%)        | 34 (51.5%)             |                      |
| Squamous cell carcinoma                        | 6 (50.0%)         | 88 (38.9%)           | 149 (49.8%)        | 30 (45.5%)             |                      |
| Melanoma                                       | 1 (8.3%)          | 6 (2.7%)             | 10 (3.3%)          | 2 (3.0%)               |                      |
| Merkel cell carcinoma                          | 0 (0%)            | 0 (0%)               | 0 (0%)             | 0 (0%)                 |                      |

<sup>1</sup> Fisher's exact test for count data, <sup>2</sup> Kruskal-Wallis rank sum test

**eTable 2.** Subdistribution Hazard Ratios (SHR) and Their 95% CIs From a Univariate Competing Risk Regression Analysis Including SUNTRAC Group as Predictor in Validation Cohort and in the TSCN Study

Optimal cut-points of the total SUNTRAC score for our cohort and those proposed by the SUNTRAC tool via recursive partitioning.

| SUNTRAC Risk Groups | SHR (95%CI) in Validation Cohort | P value |  | Optimal Validation Cohort Cut-points | Original SUNTRAC Cut-points |  |
|---------------------|----------------------------------|---------|--|--------------------------------------|-----------------------------|--|
| Low-Risk            | Reference                        | -       |  | 0-5                                  | 0-6                         |  |
| Medium-Risk         | 6.79 (3.80, 12.14)               | <0.001  |  | 6-12                                 | 7-13                        |  |
| High-Risk           | 15.91 (8.91, 28.39)              | <0.001  |  | 13-17                                | 14-17                       |  |
| Very-High-Risk      | 54.76 (29.14, 102.9)             | <0.001  |  | 18-22                                | 18-22                       |  |

**eFigure 1. Density Plots Displaying SUNTRAC Score Distribution in Validation Cohort**

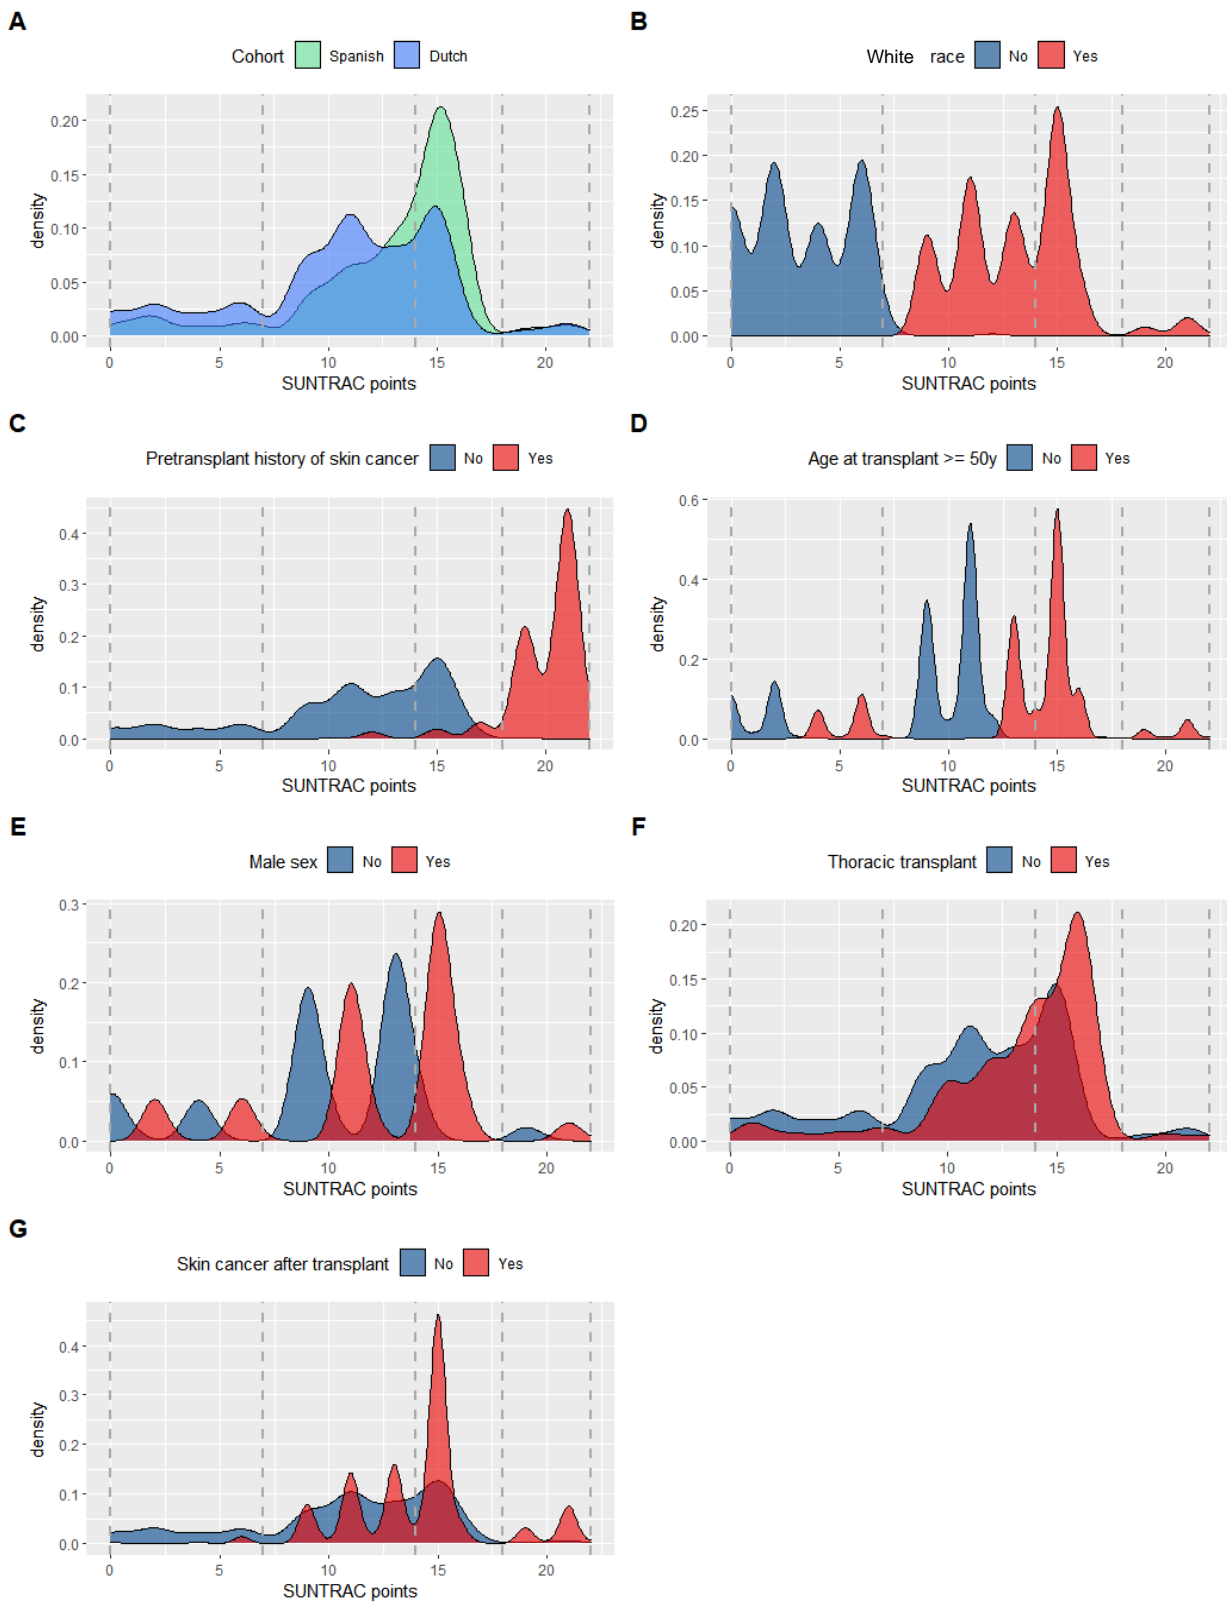

eFigure 1. Density plots displaying SUNTRAC score distribution in validation cohort by country (A), race (B), pretransplant history of skin cancer (C), age at transplant (D), sex (E), type of transplant (F) and skin cancer after transplant (G). Dashed lines indicate cutpoints for the different SUNTRAC risk groups.

**eFigure 2. Cumulative Incidence of Skin Cancer After Transplant by SUNTRAC Risk Group and Country**

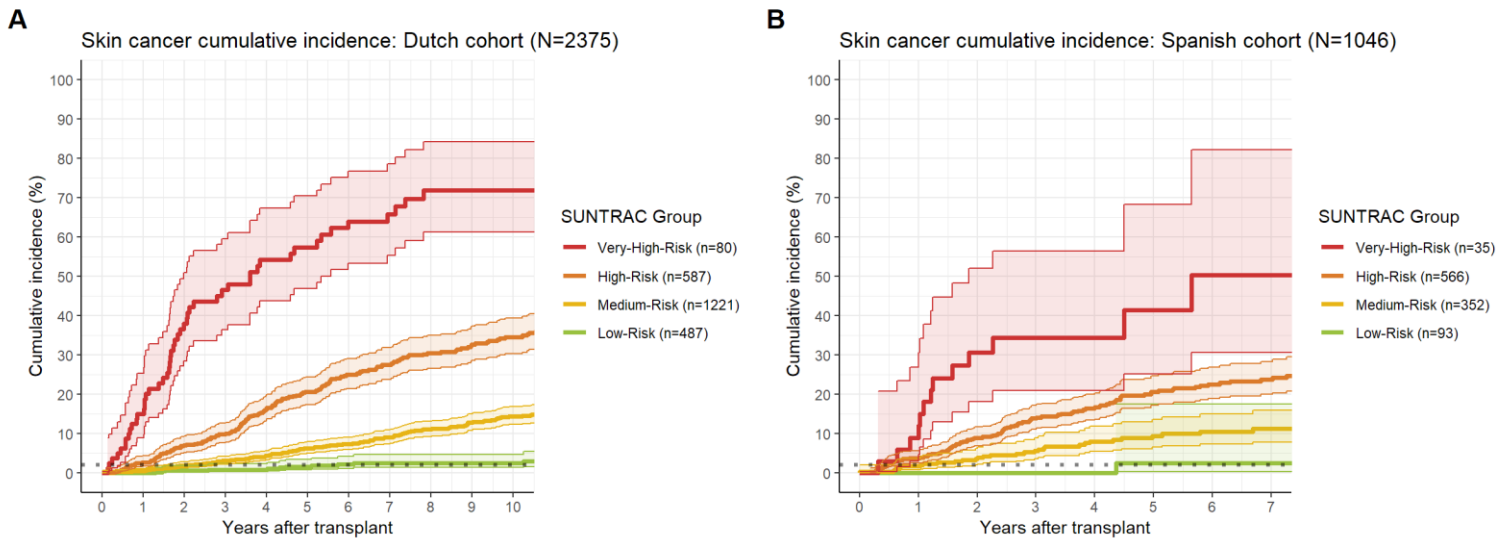

eFigure 2. Cumulative incidence of skin cancer after transplant by SUNTRAC risk group and country. A: Dutch Cohort, B: Spanish Cohort. Shaded areas represent 95% confidence intervals. Dotted line indicates screening threshold at 2% cumulative incidence.

**eFigure 3.** Time-Dependent Area Under the Receiving Operating Characteristic Curve (t-AUROC) After Transplant and ROC Curves at 5 Years After Transplant by Country

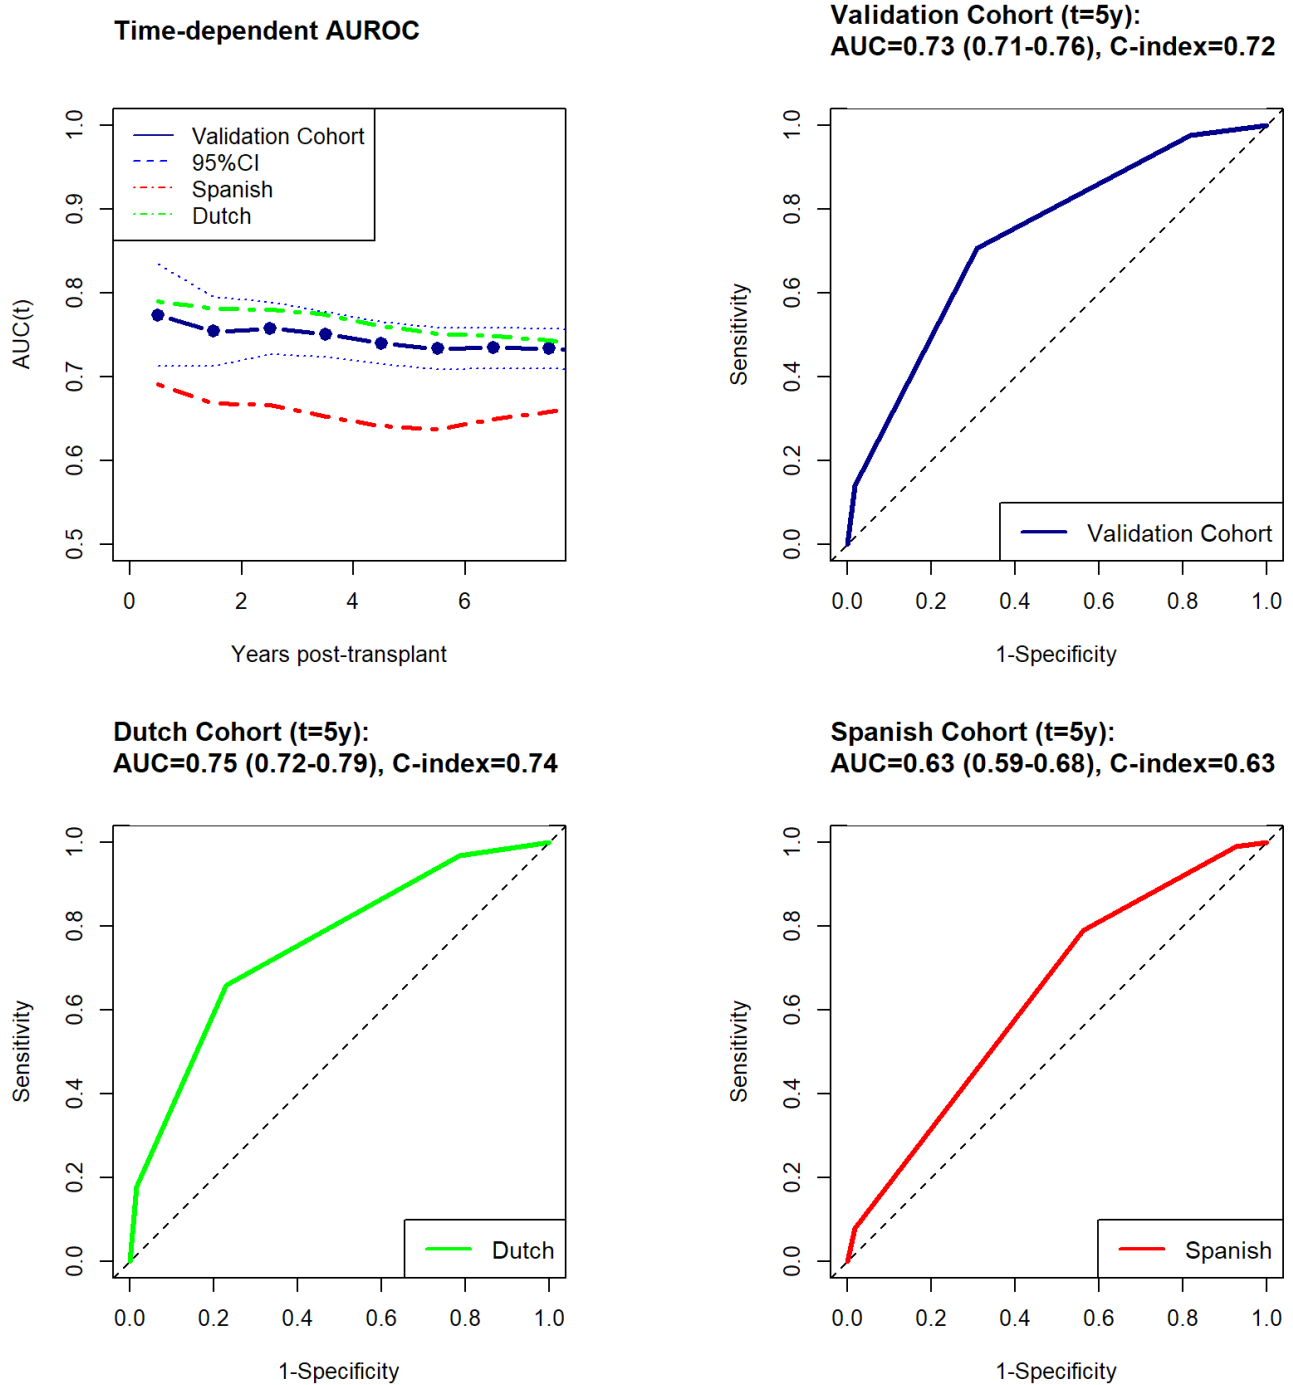

eFigure 3. Time dependent Area Under the Receiving Operating Characteristic Curve (t-AUROC) after transplant and ROC curves at five years after transplant by country. Reported performance metrics: area under the ROC curve (AUC) with 95% confidence intervals and Wolber’s concordance index (C-index).
